# Supplementary material
Source: publisher figshare collection journal article supplement (https://sage.figshare.com/ndownloader/files/15017210)
Supplement: Supplementary file 1 [file 15017210]

| Supplemental Table 1. Results of individual questions |                                                                                                            |      |     |        |                                      |
|-------------------------------------------------------|------------------------------------------------------------------------------------------------------------|------|-----|--------|--------------------------------------|
| JSPPE Question                                        |                                                                                                            | Mean | SD  | Median | Significantly different comparisons* |
| 1                                                     | My physician can view things from my perspective (see things as I see them)                                | 5.5  | 1.8 | 6.0    |                                      |
| 2                                                     | My physician asks about what is happening in my daily life                                                 | 4.9  | 2.2 | 6.0    | 1, 3, 4, 5                           |
| 3                                                     | My physician seems concerned about me and my family                                                        | 5.5  | 1.8 | 6.0    |                                      |
| 4                                                     | My physician understands my emotions, feelings and concerns                                                | 5.6  | 1.7 | 6.0    |                                      |
| 5                                                     | My physician is an understanding doctor                                                                    | 6.1  | 1.4 | 7.0    | 3, 4                                 |
| TIPS Question                                         |                                                                                                            |      |     |        |                                      |
| 1R**                                                  | I doubt that my doctor really cares about me as a person                                                   | 5.0  | 1.8 | 6.0    | 2, 3, 4, 5R, 6, 8, 9, 10             |
| 2                                                     | My doctor is usually considerate of my needs and puts them first                                           | 5.9  | 1.4 | 6.0    | 4, 5R, 7R, 11R                       |
| 3                                                     | I trust my doctor so much that I always try to follow his/her advice                                       | 5.9  | 1.4 | 6.0    | 4, 5R, 7R, 11R                       |
| 4                                                     | If my doctor tells me something is so, then it must be true                                                | 5.4  | 1.7 | 6.0    | 5R, 6, 7R, 10, 11R                   |
| 5R                                                    | I sometimes distrust my doctor's opinion and would like a second one                                       | 3.7  | 2.2 | 4.0    | 6, 7R, 8, 9, 10, 11R                 |
| 6                                                     | I trust my doctor's judgement about my medical care                                                        | 6.1  | 1.2 | 6.0    | 7R, 11R                              |
| 7R                                                    | I feel my doctor does not do everything he/she should for my medical care                                  | 4.7  | 1.9 | 6.0    | 8, 9, 10                             |
| 8                                                     | I trust my doctor to put my medical needs above all other considerations when treating my medical problems | 6.0  | 1.4 | 6.0    | 11R                                  |
| 9                                                     | My doctor is a real expert in taking care of medical problems like mine                                    | 5.8  | 1.4 | 6.0    | 11R                                  |
| 10                                                    | I trust my doctor to tell me if a mistake was made about my treatment                                      | 5.9  | 1.6 | 6.0    | 11R                                  |
| 11R                                                   | I sometimes worry that my doctor may not keep the information we discuss totally private                   | 4.8  | 1.9 | 6.0    | 10                                   |
| GBMMS Question                                        |                                                                                                            |      |     |        |                                      |
| 1                                                     | Doctors and health care workers sometimes hide information from patients who belong to my ethnic group     | 1.7  | 1.1 | 1.0    | 2R, 8R, 10R, 11                      |
| 2R                                                    | Doctors have the best interests of people of my ethnic group in mind.                                      | 2.6  | 1.7 | 2.0    | 3, 4, 5, 6, 9, 11, 12                |
| 3R                                                    | People of my ethnic group should not confide in doctors and health care workers                            | 1.5  | 0.9 | 1.0    | 8R, 9, 10R, 11                       |
| 4                                                     | People of my ethnic group should be suspicious of information from doctors and health care workers         | 1.5  | 0.9 | 1.0    | 8R, 9, 10R, 11                       |
| 5                                                     | People of my ethnic group can't trust doctors and health care workers                                      | 1.4  | 0.8 | 1.0    | 7, 8R, 9, 10R, 11                    |
| 6                                                     | People of my ethnic group should be suspicious of modern medicine                                          | 1.6  | 1.1 | 1.0    | 8R, 10R, 11                          |

|     |                                                                                                                                                                                                                                                   |     |     |     |            |
|-----|---------------------------------------------------------------------------------------------------------------------------------------------------------------------------------------------------------------------------------------------------|-----|-----|-----|------------|
| 7   | Doctors and health care workers treat people of my ethnic group like 'guinea pigs'                                                                                                                                                                | 1.8 | 1.4 | 1.0 | 8R, 11, 12 |
| 8R  | People of my ethnic group receive the same medical care from doctors and health care workers as people from other groups                                                                                                                          | 2.5 | 1.8 | 2.0 | 9, 10, 11  |
| 9   | Doctors and health care workers do not take the medical complaints of people of my ethnic group seriously                                                                                                                                         | 1.9 | 1.3 | 1.0 | 10, 11     |
| 10R | People of my ethnic group are treated the same as people of other groups by doctors and health care workers                                                                                                                                       | 2.2 | 1.6 | 1.0 | 11, 12     |
| 11R | In most hospitals, people of different ethnic groups receive the same kind of care                                                                                                                                                                | 1.4 | 1.6 | 1.0 | 12         |
| 12  | I have personally been treated poorly or unfairly by doctors or health care workers because of my ethnicity                                                                                                                                       | 1.3 | 0.9 | 1.0 | 11         |
|     | *The numbers in this column indicate the questions that had significantly different comparisons to this question, using Kruskal-Wallis with Dunn's pairwise comparison post-hoc; ** The "R" indicates the patient response was subtracted from 5; |     |     |     |            |

| Supplemental Table 2. Mean and standard deviation values for the three surveys stratified by patient features |          |                     |                                |                     |                     |                                |                     |                     |                                |                     |
|---------------------------------------------------------------------------------------------------------------|----------|---------------------|--------------------------------|---------------------|---------------------|--------------------------------|---------------------|---------------------|--------------------------------|---------------------|
| Feature                                                                                                       |          | JSPPE               |                                | TIPS                |                     | GBMMS                          |                     |                     |                                |                     |
|                                                                                                               |          | A. Female           | B. Male                        | A. Female           | B. Male             | A. Female                      | B. Male             |                     |                                |                     |
| Gender                                                                                                        | Mean     | 27                  | 28                             | 57                  | 60                  | 27                             | 28                  |                     |                                |                     |
|                                                                                                               | SD       | 8                   | 7                              | 12                  | 11                  | 7                              | 7                   |                     |                                |                     |
|                                                                                                               | p*       | 0.042               |                                | 0.001               |                     | 0.270                          |                     |                     |                                |                     |
| Race                                                                                                          |          | JSPPE               |                                | TIPS                |                     | GBMMS                          |                     |                     |                                |                     |
|                                                                                                               |          | A. White            | B. Non White                   | A. White            | B. Non White        | A. White                       | B. Non White        |                     |                                |                     |
|                                                                                                               | Mean     | 27                  | 28                             | 52                  | 53                  | 19                             | 21                  |                     |                                |                     |
|                                                                                                               | SD       | 7                   | 8                              | 11                  | 12                  | 8                              | 10                  |                     |                                |                     |
|                                                                                                               | p*       | 0.060               |                                | 0.117               |                     | 0.0004                         |                     |                     |                                |                     |
| Education                                                                                                     |          | JSPPE               |                                |                     | TIPS                |                                |                     | GBMMS               |                                |                     |
|                                                                                                               |          | A. Some High School | B. High school or some college | C. College graduate | A. Some High School | B. High school or some college | C. College graduate | A. Some High School | B. High school or some college | C. College graduate |
|                                                                                                               | Mean     | 29                  | 26                             | 27                  | 57                  | 52                             | 50                  | 22                  | 20                             | 23                  |
|                                                                                                               | SD       | 7                   | 8                              | 6                   | 9                   | 11                             | 12                  | 9                   | 10                             | 10                  |
|                                                                                                               | P<0.05** | B and C             |                                |                     | B and C             |                                |                     |                     |                                |                     |

\*Mann-Whitney U; \*\*Denotes P<0.05 by Kruskal-Wallis and by pairwise comparisons with Dunn's post-hoc
